# Supplementary figures and images for: Synthesis and nanostructures of several tetrathiafulvalene derivatives having the side chains composed of chiral and hydrogen-bonding groups and their charge-transfer complexes
Source: Royal Society of Chemistry journal article supplement (doi:10.1039/c3dt51464a), 2013-01-01

Supporting Information

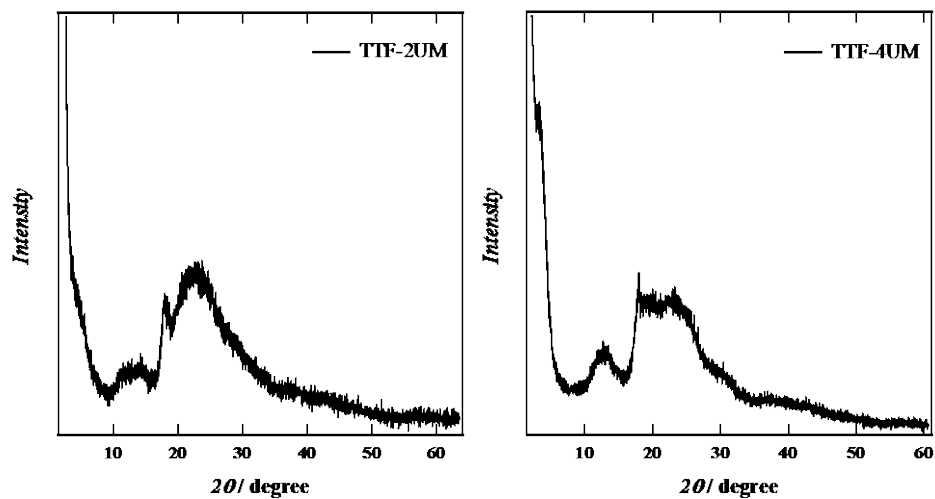

Fig. S1. XRD diffraction patterns of TTF-2UM and TTF-4UM.

Supplement: c3dt51464a.pdf [file c3dt51464a.pdf]
